# Supplementary material for: Reanalysis of the longest mass balance series in Himalaya using a nonlinear model: Chhota Shigri Glacier (India)
Source: Copernicus journal article supplement (doi:10.5194/tc-18-5653-2024), 2024-12-05
Supplement: Supplementary file 1 [file tc-18-5653-2024-supplement.pdf]

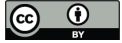

*Supplement of*

**Reanalysis of the longest mass balance series in Himalaya using a nonlinear model: Chhota Shigri Glacier (India)**

**Mohd Farooq Azam et al.**

*Correspondence to:* Mohd Farooq Azam (farooqazam@iiti.ac.in, farooqaman@yahoo.co.in)

The copyright of individual parts of the supplement might differ from the article licence.

Table S1: Details of point mass balance data collection since 2002.

| <b>Year</b> | <b>Abl. PMBs</b> | <b>Acc. PMBs (east)</b> | <b>Acc. PMBs (west)</b> | <b>Acc. Point MBs</b> | <b>Total Point MBs</b> | <b>Date for measurements</b> | <b>Elevation of lowest/highest abl. PMBs</b> | <b>Elevation of lowest/highest acc. PMBs</b> | <b>Comment</b> |
|-------------|------------------|-------------------------|-------------------------|-----------------------|------------------------|------------------------------|----------------------------------------------|----------------------------------------------|----------------|
| 2002        | -                | -                       | -                       | -                     | -                      | 1-7 October 2002             | 4357/4932                                    | -                                            | 1              |
| 2003        | 12               | 3                       | 0                       | 3                     | 15                     | 1-8 October 2003             | 4360/4886                                    | 5180/5500                                    | 2              |
| 2004        | 20               | 3                       | 0                       | 3                     | 23                     | 19-24 September 2004         | 4355/4976                                    | 5180/5500                                    | 2              |
| 2005        | 28               | 2                       | 0                       | 2                     | 30                     | 1-7 October 2005             | 4355/4884                                    | 5180/5500                                    | 2              |
| 2006        | 22               | 1                       | 0                       | 1                     | 23                     | 28 Sept -4 October 2006      | 4363/5090                                    | 5170                                         | 3              |
| 2007        | 16               | 1                       | 0                       | 1                     | 17                     | 27 Sept -5 October 2007      | 4363/4913                                    | 5180                                         | 3              |
| 2008        | 15               | 1                       | 0                       | 1                     | 16                     | 2-13 October 2008            | 4363/5090                                    | 5171                                         | 3              |
| 2009        | 10               | 5                       | 2                       | 7                     | 17                     | 3-14 October 2009            | 4423/4806                                    | 5090/5550                                    | -              |
| 2010        | 25               | 3                       | 2                       | 5                     | 30                     | 2-13 October 2010            | 4365/4881                                    | 5160/5300                                    | 3              |
| 2011        | 25               | 4                       | 2                       | 6                     | 31                     | 5-13 October 2011            | 4390/4906                                    | 5160/5520                                    | -              |
| 2012        | 15               | 3                       | 2                       | 5                     | 20                     | 7-15 October 2012            | 4496/4902                                    | 5160/5303                                    | 3              |
| 2013        | 22               | 3                       | 2                       | 5                     | 27                     | 27 Sept-07 Oct 2013          | 4351/4897                                    | 5158/5303                                    | 3              |
| 2014        | 21               | 3                       | 0                       | 3                     | 24                     | 2-8 October 2014             | 4394/4991                                    | 5180/5200                                    | 3              |
| 2015        | 13               | 0                       | 2                       | 2                     | 15                     | 4-12 October 2015            | 4382/4927                                    | 5150/5100                                    | 4              |
| 2016        | 16               | 2                       | 1                       | 3                     | 19                     | 2-7 October 2016             | 4426/4900                                    | 5150/5285                                    | 3              |
| 2017        | 16               | 4                       | 2                       | 6                     | 22                     | 4-8 October 2017             | 4326/4771                                    | 5161/5266                                    | 3              |
| 2018        | 15               | 0                       | 0                       | 0                     | 15                     | 12-16 September 2018         | 4276/4786                                    | -                                            | 5              |
| 2019        | 14               | 3                       | 2                       | 5                     | 19                     | 15-19 September 2019         | 4276/4794                                    | 5170/5310                                    | 3              |
| 2020        | 2                | 0                       | 0                       | 0                     | 2                      | 06 October 2020              | 4739/4764                                    | -                                            | 6              |
| 2021        | 0                | 0                       | 0                       | 0                     | 0                      | -                            | -                                            | -                                            | 7              |
| 2022        | 23               | 1                       | 2                       | 3                     | 26                     | 3-10 October 2022            | 4263/4893                                    | 5150/5215                                    | 3              |
| 2023        | 23               | 1                       | 2                       | 3                     | 26                     | 12-17 September 2023         | 4263/4893                                    | 5206/5300                                    | 3              |

1. A total of 14 stakes were installed in the ablation area to initiate the mass balance observations.
2. Accumulation in western tributary glacier was assumed to be similar as in the eastern side.
3. No accumulation measurement was done at 5500 and it was extrapolated from previous years.
4. No accumulation measurement was done in east part, and it was extrapolated from previous years.
5. No accumulation measurement was done, and it was extrapolated from previous years.
6. No accumulation measurement was done, and only two stakes were observed so mass balance could not be estimated.
6. No field measurements were done hence mass balance could not be estimated.

Table S2: The modelled spatial terms ( $\alpha_i$  and  $\gamma_i$ ) for each location.

| <b>Easting</b> | <b>Northing</b> | <b>Elevation (m a.s.l.)</b> | <b><math>\alpha_i</math></b> | <b><math>\gamma_i</math></b> |
|----------------|-----------------|-----------------------------|------------------------------|------------------------------|
| 738200         | 3572100         | 4339                        | -4.33                        | 0.96                         |
| 738200         | 3571900         | 4359                        | -4.29                        | 0.95                         |
| 738000         | 3571900         | 4373                        | -4.49                        | 0.95                         |
| 738000         | 3571700         | 4410                        | -4.40                        | 0.93                         |
| 738000         | 3571500         | 4415                        | -4.62                        | 0.93                         |
| 737800         | 3571300         | 4444                        | -4.04                        | 0.92                         |
| 738000         | 3571300         | 4464                        | -4.19                        | 0.91                         |
| 737800         | 3571100         | 4490                        | -3.81                        | 0.90                         |
| 737600         | 3570900         | 4496                        | -4.11                        | 0.90                         |
| 737600         | 3570700         | 4541                        | -3.74                        | 0.88                         |
| 737600         | 3570500         | 4558                        | -3.71                        | 0.88                         |
| 737400         | 3570100         | 4575                        | -3.04                        | 0.87                         |
| 737400         | 3570500         | 4581                        | -3.32                        | 0.87                         |
| 737200         | 3570500         | 4586                        | -3.77                        | 0.87                         |
| 737400         | 3570300         | 4600                        | -3.41                        | 0.86                         |
| 737200         | 3570300         | 4620                        | -3.22                        | 0.85                         |
| 737000         | 3570100         | 4624                        | -3.28                        | 0.85                         |
| 736800         | 3569700         | 4655                        | -3.34                        | 0.84                         |
| 737000         | 3569900         | 4661                        | -3.37                        | 0.83                         |
| 737200         | 3569700         | 4671                        | -3.27                        | 0.83                         |
| 737000         | 3569300         | 4672                        | -2.95                        | 0.83                         |
| 736600         | 3568900         | 4714                        | -2.96                        | 0.81                         |
| 737000         | 3569100         | 4715                        | -2.73                        | 0.81                         |
| 736800         | 3569300         | 4716                        | -3.06                        | 0.81                         |
| 736800         | 3568700         | 4726                        | -2.64                        | 0.81                         |
| 736600         | 3568500         | 4747                        | -2.69                        | 0.80                         |
| 736600         | 3568700         | 4749                        | -2.55                        | 0.80                         |
| 736800         | 3568500         | 4754                        | -2.67                        | 0.79                         |
| 736800         | 3568300         | 4760                        | -2.21                        | 0.79                         |
| 736600         | 3568300         | 4765                        | -1.95                        | 0.79                         |
| 736400         | 3568300         | 4778                        | -1.91                        | 0.78                         |
| 736800         | 3568100         | 4782                        | -2.24                        | 0.78                         |
| 736600         | 3568100         | 4784                        | -1.93                        | 0.78                         |
| 736400         | 3568100         | 4802                        | -1.86                        | 0.77                         |
| 736800         | 3567900         | 4813                        | -1.41                        | 0.76                         |
| 736200         | 3568100         | 4825                        | -1.98                        | 0.76                         |
| 737000         | 3567700         | 4835                        | -1.32                        | 0.75                         |
| 736000         | 3568500         | 4861                        | -1.74                        | 0.74                         |
| 737000         | 3567300         | 4870                        | -1.33                        | 0.74                         |
| 736000         | 3568300         | 4876                        | -1.24                        | 0.73                         |
| 735800         | 3568300         | 4882                        | -1.29                        | 0.73                         |
| 737000         | 3567100         | 4893                        | -1.09                        | 0.72                         |
| 737000         | 3566900         | 4903                        | -0.48                        | 0.72                         |

|        |         |      |       |      |
|--------|---------|------|-------|------|
| 735800 | 3568500 | 4907 | -1.60 | 0.72 |
| 737400 | 3566100 | 4984 | -0.18 | 0.68 |
| 735600 | 3569900 | 5090 | -0.67 | 0.62 |
| 737800 | 3565300 | 5158 | 1.11  | 0.57 |
| 737800 | 3565500 | 5162 | 0.95  | 0.57 |
| 738000 | 3565700 | 5175 | 0.70  | 0.56 |
| 738000 | 3565500 | 5205 | 0.80  | 0.55 |
| 735200 | 3569100 | 5207 | 0.81  | 0.54 |
| 735000 | 3569500 | 5299 | 0.93  | 0.48 |
| 738600 | 3565900 | 5405 | 1.91  | 0.41 |
| 738600 | 3566300 | 5514 | 1.36  | 0.33 |

Table S3: The modelled temporal term ( $\beta_t$ ) for each year. The point MBs for each location and year can be calculated using the spatial terms from Table S2 and temporal term from this table following equation no 2 for each location and year.

| <b>Year</b> | <b><math>\beta_t</math></b> |
|-------------|-----------------------------|
| 2003        | -0.86                       |
| 2004        | -0.92                       |
| 2005        | 1.59                        |
| 2006        | -0.93                       |
| 2007        | -0.58                       |
| 2008        | -0.21                       |
| 2009        | 1.27                        |
| 2010        | 1.50                        |
| 2011        | 0.57                        |
| 2012        | 0.17                        |
| 2013        | -0.60                       |
| 2014        | 0.75                        |
| 2015        | 0.52                        |
| 2016        | -0.79                       |
| 2017        | -0.83                       |
| 2018        | -1.04                       |
| 2019        | 1.42                        |
| 2020        | -0.52                       |
| 2021        | 0.66                        |
| 2022        | -2.08                       |
| 2023        | 0.93                        |

### Geodetic mass balance over 2003-2020:

In the main manuscript, the geodetic mass balances (MBs) for Chhota Shigri Glacier have been estimated over two periods of 2003–2014 and 2014–2020 using satellite stereo images from ASTER (08/10/2003) and Pléiades (26/09/2014 and 12/09/2020). Here, the MB is also estimated over the full period of 2003–2020 using ASTER (08/10/2003) and Pléiades (12/09/2020) DEMs and used to calibrate MBs from nonlinear model and traditional glaciological method. The estimated geodetic MB over 2003–2020 is  $-0.45 \pm 0.10$  m w.e. a<sup>-1</sup> (equivalent to a total mass wastage of  $-7.62$  m w.e.), slightly different from the weighted average MB of  $-0.43$  m w.e. a<sup>-1</sup> (equivalent to a total mass wastage of  $-7.33$  m w.e.) of 2003–2014 and 2014–2020 periods. Figure S2 shows the calibration results using geodetic MB estimates over two periods (2003–2014 and 2014–2020) and one single period (2003–2020).

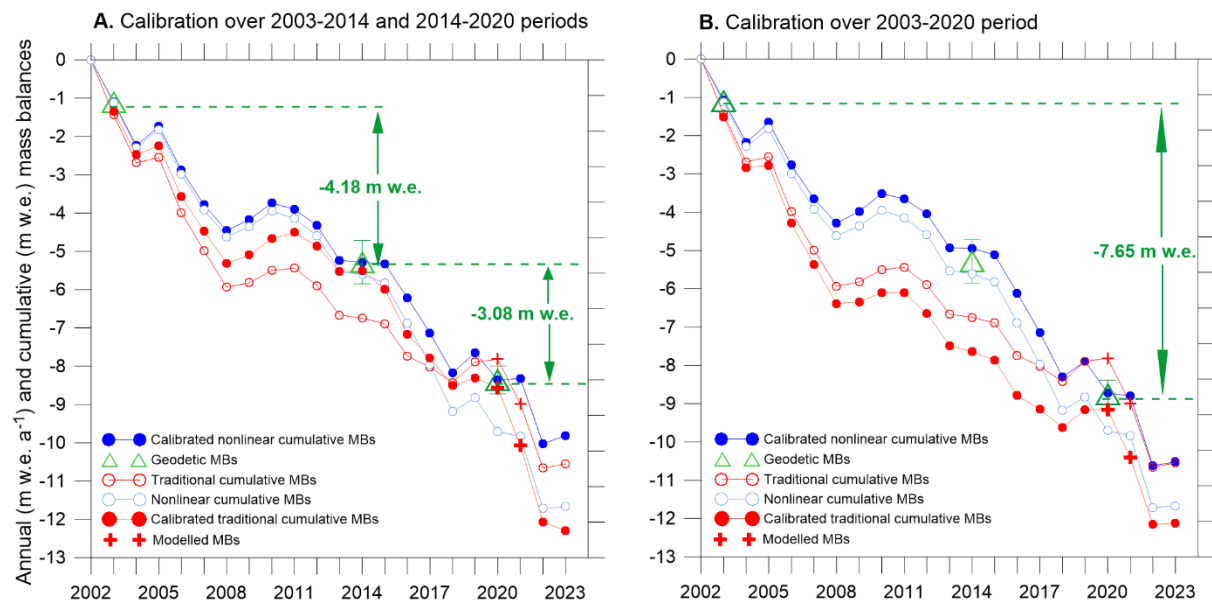

Figure S1: The calibration of homogenized glacier-wide MBs from traditional and nonlinear model using geodetic MBs over two periods over 2003-2014 and 2014-2020 (A) and one period (B) 2003-2020.

### Comparison of all in-situ, extrapolated and modelled point-MBs over 2003-2023:

Figure S2 shows the in-situ point-MBs (including the erroneous measurements), all extrapolated MBs (used in glacier-wide MBs estimated in the previous studies) and the modelled point-MBs against their corresponding elevations for each year between 2002 and 2023.

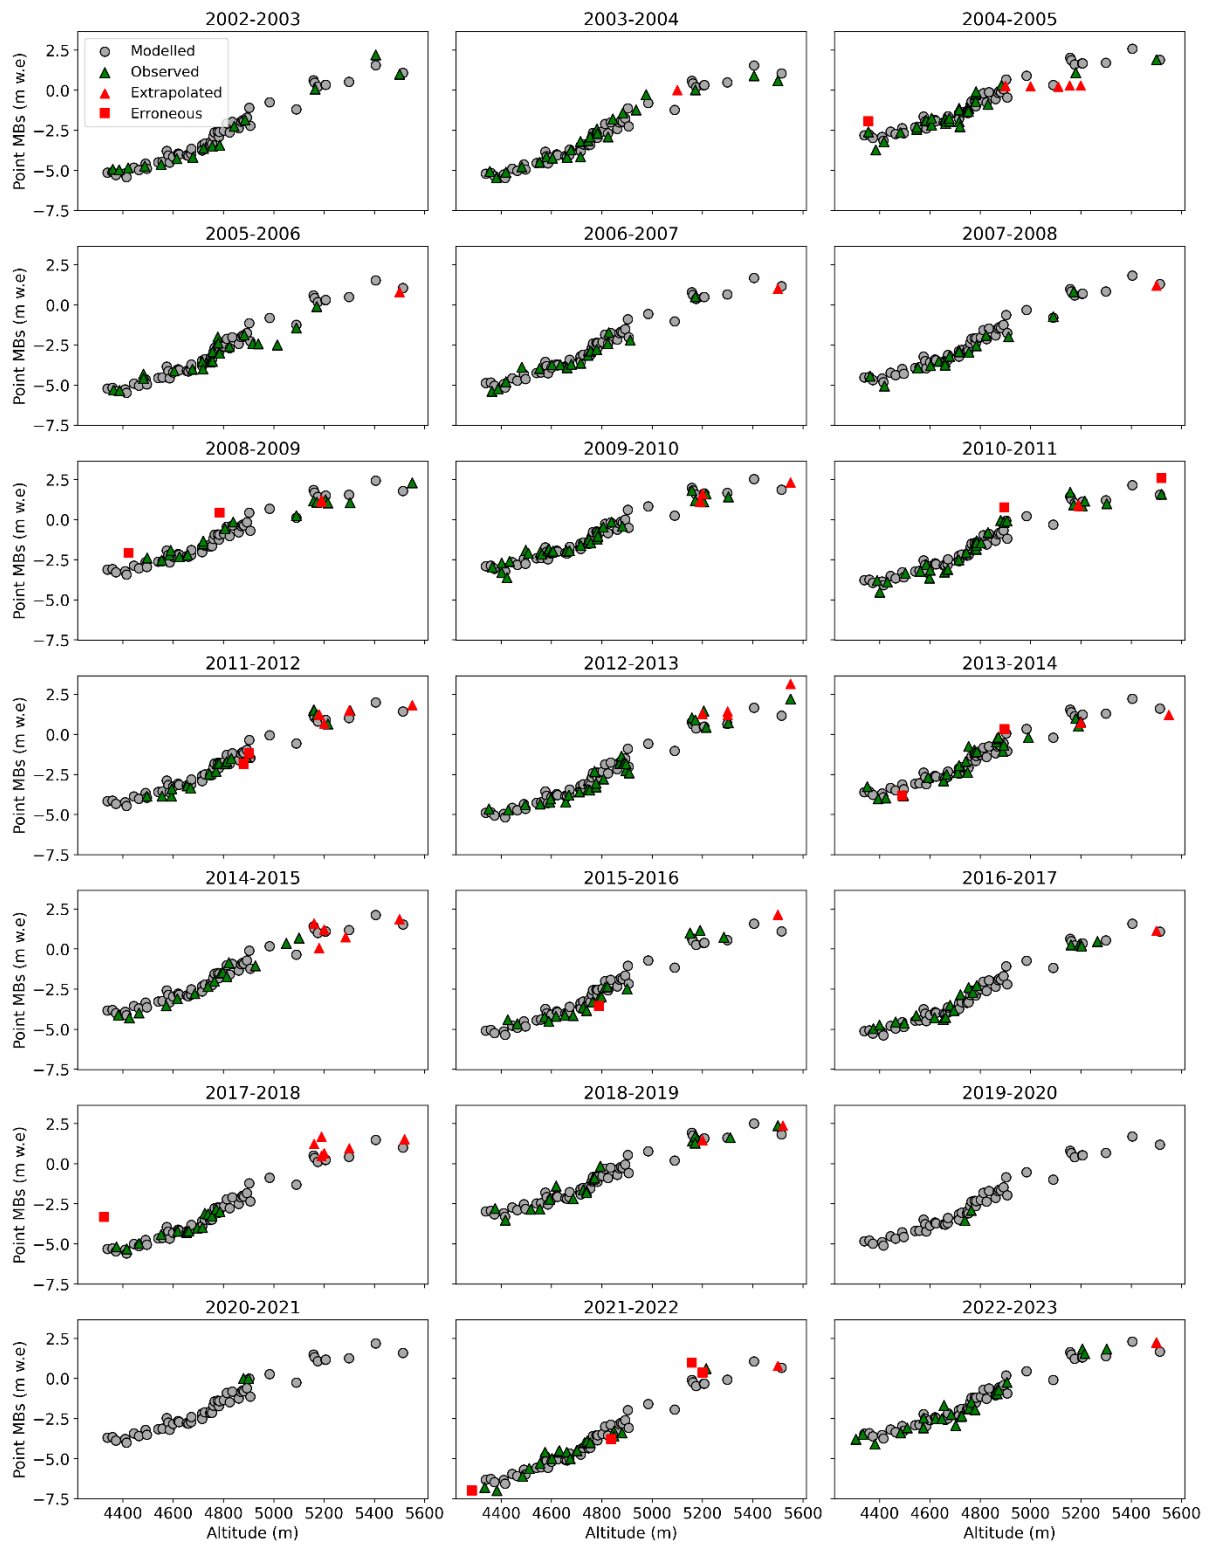

Figure S2: The observed (green triangles) and modelled (grey circles) point MBs against their corresponding elevations for the hydrological years between 2002 and 2023. The extrapolated (red triangles) and erroneous (red squares) point MBs are also shown.

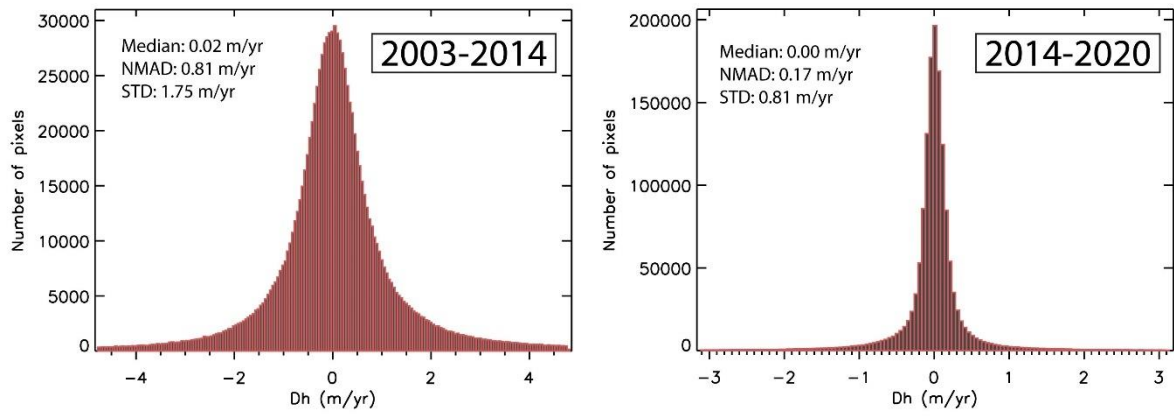

Figure S3: Histograms of the elevation differences off glacier for 2003-2014 and 2014-2020. Simple statistics are also provided.
